# Supplementary material for: Factors Determining Immunological Response to Vaccination against Tick-Borne Encephalitis Virus in Older Individuals
Source: PLOS journal article supplement (doi:10.1371/journal.pone.0100860), 2014-06-26
Supplement: S1 (10.1371/journal.pone.0100860.s001) [file journal.pone.0100860.s001]

## Questionnaire for you who have been tick-bitten

Please answer all questions!

### When did you notice you had been tick-bitten?

Year-Month-Day: \_\_\_\_\_ Time \_\_\_\_\_

### When do you think you were tick-bitten?

Year-Month-Day: \_\_\_\_\_ Time \_\_\_\_\_

### In what town/city were you when you were tick-bitten?

\_\_\_\_\_

### What kind of nature type had you visited?

Lake/Sea ☐ Forrest ☐ Garden ☐ Lawn ☐

Other: \_\_\_\_\_

### When was the tick removed?

Year-Month-Day: \_\_\_\_\_ Time \_\_\_\_\_

### Where on the body was the tick attached?

\_\_\_\_\_

### Did you remove the whole tick?

Yes ☐ No ☐ Don't know ☐

### Have you had any other tick bites this season?

Yes ☐ No ☐ Don't know ☐

If Yes, how many? 1-4 ☐ 5-9 ☐ >10 ☐

**Have you ever been treated for the tick-borne infection Borrelia?**Yes ☐ No ☐ Don't know ☐ If Yes; Year-Month-Day \_\_\_\_\_**Did you receive any medicine?**Yes ☐ No ☐ Don't know ☐ If Yes; which kind? \_\_\_\_\_**Have you ever been treated for the tick-borne infection Erythema migrans?**

(Erythema migrans = red ring-like or homogenous expanding rash.)

Yes ☐ No ☐ Don't know ☐ If Yes; Year-Month-Day \_\_\_\_\_**Did you receive any medicine?**Yes ☐ No ☐ Don't know ☐ If Yes; which kind? \_\_\_\_\_**Have you ever been treated for the tick-borne infection Ehrlichiosis?**

(Ehrlichiosis = flu-like symptoms)

Yes ☐ No ☐ Don't know ☐ If Yes; Year-Month-Day \_\_\_\_\_**Did you receive any medicine?**Yes ☐ No ☐ Don't know ☐ If Yes; which kind? \_\_\_\_\_

**Have you ever been treated for the tick-borne infection TBE?**

(TBE = a viral infectious disease involving the central nervous system.)

Yes ☐ No ☐ Don't know ☐ If Yes; Year-Month-Day \_\_\_\_\_**Did you receive any medicine?**Yes ☐ No ☐ Don't know ☐ If Yes; which kind? \_\_\_\_\_**Do you have any of the following diseases?****Asthma** Yes ☐ No ☐ Don't know ☐**Allergy** Yes ☐ No ☐ Don't know ☐**Diabetes** Yes ☐ No ☐ Don't know ☐**Tumour-related disease** Yes ☐ No ☐ Don't know ☐**Are you on medication?** Yes ☐ No ☐If Yes; which kind?  
\_\_\_\_\_**Do you smoke?** Yes ☐ No ☐ Stopped smoking ☐ Year \_\_\_\_\_

If Yes, how many cigarettes per week? \_\_\_\_\_

How many years have you smoked? \_\_\_\_\_

**Do you have any pets?**

Yes ☐ No ☐

**Dog**

Yes ☐ No ☐

**Cat**

Yes ☐ No ☐

**Bunny**

Yes ☐ No ☐

**Other:** \_\_\_\_\_

**Are you vaccinated for TBE?**

Yes ☐ No ☐ Don't know ☐

If Yes; Year-Month-Day\_\_\_\_\_

**Are you vaccinated for Yellow fever?**

Yes ☐ No ☐ Don't know ☐

If Yes; Year-Month-Day\_\_\_\_\_

**Are you vaccinated for Japanese encephalitis?** Yes ☐ No ☐ Don't know ☐

If Yes; Year-Month-Day\_\_\_\_\_

**Thank you for your answers!**

Hi!

You are a participant in our study "Tick-bites and risk of disease". We previously received blood samples from you and a filled in questionnaire. Now, three month later we need a follow up blood sample. The follow up blood samples can be taken at \_\_\_\_\_, week \_\_\_\_\_, Monday, Tuesday, Wednesday, or Thursday, between \_\_\_\_\_ and \_\_\_\_\_ a clock.

If you had additional tick-bites since the first one and you have collected the ticks in the tube with a yellow cork, then please take that tube with you to the blood sampling.

We would like to know if you have had any symptoms related to tick-borne diseases during the study period. Please answer the following three questions and write your name, birth date and telephone number on the next page. We might give you a telephone call if you reported symptoms. Take this paper and the test tubes to your primary health care center when you go for the sample-taking.

**1) Have you had additional tick-bites since the first sample-taking?**

Yes ☐ No ☐ Don't know ☐

If yes; when? Year-Month-Day: \_\_\_\_\_

**2) How have you been feeling in general since the first sample-taking?**

Have you been feeling good/as usual?

Yes ☐ No ☐ Don't know ☐

If no; please report if you had any of the following symptoms:

|                            |                              |                             |
|----------------------------|------------------------------|-----------------------------|
| Headache                   | Yes <input type="checkbox"/> | No <input type="checkbox"/> |
| Fatigue                    | Yes <input type="checkbox"/> | No <input type="checkbox"/> |
| Fever, 38° or higher       | Yes <input type="checkbox"/> | No <input type="checkbox"/> |
| Neck pain                  | Yes <input type="checkbox"/> | No <input type="checkbox"/> |
| Loss of appetite           | Yes <input type="checkbox"/> | No <input type="checkbox"/> |
| Nausea/Vomiting            | Yes <input type="checkbox"/> | No <input type="checkbox"/> |
| Weight Loss                | Yes <input type="checkbox"/> | No <input type="checkbox"/> |
| Vertigo                    | Yes <input type="checkbox"/> | No <input type="checkbox"/> |
| Concentration difficulties | Yes <input type="checkbox"/> | No <input type="checkbox"/> |
| Radiating pain             | Yes <input type="checkbox"/> | No <input type="checkbox"/> |
| Muscle or joint pain       | Yes <input type="checkbox"/> | No <input type="checkbox"/> |
| Numbness/formication       | Yes <input type="checkbox"/> | No <input type="checkbox"/> |

Please turn the page!

**3) If you reported any symptoms in question 2, did the symptoms arrive before or after any additional tick-bites?**

Before additional tick-bite                      Yes ☐    No ☐    Don't know ☐

After additional tick-bite                      Yes ☐    No ☐    Don't know ☐

**4) If you reported any symptoms in question 2, did you visit you primary health care center for this?**

Yes ☐    No ☐

**5) If you reported any symptoms in question 2, how many days did the symptoms last?**

\_\_\_\_\_

**Thank you for your answers!**

**Please make sure you answered every question!  
Bring this paper to your new sample-taking!**

**Name:** \_\_\_\_\_

**Birth:** \_\_\_\_\_

**Telephone number:**

**Home**

\_\_\_\_\_

**Work**

\_\_\_\_\_

**Mobile**

\_\_\_\_\_

**Best regards**

**xxx xxxx**
